# Supplementary material for: Alveolar pentraxin 3 as an early marker of microbiologically confirmed pneumonia: a threshold-finding prospective observational study
Source: PubMed Central journal article supplement (PMC4219103; doi:10.1186/s13054-014-0562-5), 2014-10-15

**Alveolar Pentraxin 3 as an early marker of microbiologically confirmed pneumonia: a threshold-finding prospective observational study**

Tommaso Mauri, Andrea Coppadoro, Michela Bombino, Giacomo Bellani, Vanessa Zambelli, Carla Fornari, Lorenzo Berra, Edward A Bittner, Ulrich Schmidt, Marina Sironi, Barbara Bottazzi, Paolo Brambilla, Alberto Mantovani, Antonio Pesenti.

**Additional file 1**

## **METHODS**

**BAL sTREM-1 assay.** Human sTREM-1 was measured in duplicate with a commercial sandwich ELISA kit (detection limit 8 pg/mL; SIGMA Aldrich, St. Louis, MO; Catalog Number RAB0501) validated for human plasma and serum but not for BAL. To validate the assay for BAL, a spike of sTREM-1 was added to 14 different BAL samples and recovery was evaluated. A recovery of 70-100% was observed in 65% of the samples analyzed while in 20% of samples we had a 50% recovery. In 1 sample out of 14 we were not able to measure the spike of sTREM-1. Thus, these data suggest that the assay used in the present study can measure sTREM-1 levels in BAL with acceptable accuracy.

**Data collection at BAL sampling.** Right before BAL was performed, we recorded: SAPS II score at admission [E1], hospital admission and intubation dates, mechanical ventilation settings, oxygenation, signs of sepsis, sequential organ failure assessment (SOFA) score values [E2], number of organ failures, immunosuppression, clinical pulmonary infection score (CPIS) values [E3] and reason for performing BAL (e.g., pneumonia suspicion or to exclude lung cancer).

**Intra-cellular staining.** The BAL fluids of 20 consecutive patients (all enrolled in Monza) were centrifuged (1500 rpm for 10 min at 4°C) and the cells pellets were re-suspended with 0.5 ml phosphate buffered saline and used for cell counting (Turk solution and Burker chamber). Cells were then spun with Cytocentrifuge (900 rpm for 5 min at 4°C) on different slides to perform PTX3 immuno-staining and evaluate the fraction of BAL cells positive to intracellular PTX3, as previously described [E4]. Briefly, cells were fixed with paraformaldehyde 4%, permeabilized with glycine and incubated with rabbit pAb anti-hPTX3 and then with goat anti-rabbit IgG Alexa Fluor 488 conjugated, while bisbenzimidazole was used to stain DNA and recognize nuclei.

## RESULTS

**Microbiology results.** Considering all 82 BAL, on the day they were performed, antimicrobial therapy was ongoing in 73 cases (89%). Table E1 reports detailed microbiology results of all culture-positive BAL cases. Positive bacterial cases presenting fungal or bacterial contaminants were 4 (5% of all BALs). Negative cases presenting fungal or bacterial contaminants were 11 (13%), while viral contamination was detected in 16 negative BALfs (19%), likely indicating redundant requests.

**Alternative diagnoses.** Considering all 82 BAL, non-pneumonia cases (n=58, 71%) were classified as follows: BAL performed in patients without clinical signs of pneumonia (n=12, 21%) acute respiratory distress syndrome (ARDS) of extra-pulmonary origin in 17 cases (29%), cardiogenic pulmonary edema in 10 (17%), primary non-infectious ARDS in 10 (17%), acute exacerbations of chronic obstructive pulmonary disease in 3 (5%), lobar atelectasis in 3 (5%) and undetermined in 3 (5%).

**BAL PTX3 in different pneumonia subtypes.** BAL PTX3 levels were increased in presence of VAP in comparison to CAP or HAP (26.26 [5.61-48.59] vs. 2.18 [1.03-7.39] 1.40 [0.00-9.24] ng/mL,  $p < 0.05$ ) likely reflecting clinical severity, while alveolar PTX3 didn't differ between bacterial, viral and fungal etiology ( $p > 0.05$ , data not shown). When we considered net reclassification index values of BAL PTX3 vs. all other biomarkers and CPIS only for patients with bacterial pneumonia, they were positive (range 0.22-0.51) with gain in sensitivity, specificity or both.

**Correlations between biomarkers.** BAL and plasma PTX3 concentrations were not correlated ( $\rho = -0.068$ ,  $p > 0.05$ ). We couldn't detect any relation between BAL PTX3 and BAL sTREM-1 levels and between BAL PTX3 and circulating sTREM-1, CRP or PCT ( $p > 0.05$ , data not shown).

**Immuno-stained subset.** In the 20 samples that underwent immuno-staining, BAL PTX3 was significantly higher in pneumonia samples (n=6, 30%) in comparison to negative ones ( $p < 0.01$ , data not shown): thus, this subset might be regarded as representative of the overall population.

## REFERENCES

- E1. Le Gall JR, Lemeshow S, Saulnier F: **A new Simplified Acute Physiology Score (SAPS II) based on a European/North American multicenter study.** *JAMA* 1993, **270**:2957-2963.
- E2. Vincent JL, Moreno R, Takala J, Willatts S, De Mendonça A, Bruining H, Reinhart CK, Suter PM, Thijs LG. **The SOFA (Sepsis-related Organ Failure Assessment) score to describe organ dysfunction/failure. On behalf of the Working Group on Sepsis-Related Problems of the European Society of Intensive Care Medicine.** *Intensive Care Med* 1996, **22**:707-710.
- E3. Pugin J, Auckenthaler R, Mili N, Janssens JP, Lew PD, Suter PM: **Diagnosis of ventilator-associated pneumonia by bacteriologic analysis of bronchoscopic and nonbronchoscopic “blind” bronchoalveolar lavage fluid.** *Am Rev Respir Dis* 1991, **143**:1121-1129.
- E4. Jaillon S, Peri G, Delneste Y, Frémaux I, Doni A, Moalli F, Garlanda C, Romani L, Gascan H, Bellocchio S, Bozza S, Cassatella MA, Jeannin P, Mantovani A: **The humoral pattern recognition receptor PTX3 is stored in neutrophil granules and localizes in extracellular traps.** *J Exp Med* 2007, **204**:793-804.

## TABLES

**Table E1. Detailed brocho-alveolar lavage (BAL) microbiology results of patients with pneumonia in the study cohort**

| <b>Microbe*</b>                     | <b>Positive BAL samples†<br/>Derivation cohort<br/>n=24</b> |
|-------------------------------------|-------------------------------------------------------------|
| <i>MRSA</i>                         | 5                                                           |
| <i>Streptococcus Pneumoniae</i>     | 1                                                           |
| <i>Pseudomonas Aeruginosa</i>       | 2                                                           |
| <i>Acinetobacter Baumannii</i>      | 1                                                           |
| <i>Enterobacter spp</i>             | 2                                                           |
| <i>Haemophilus Influenzae</i>       | 2                                                           |
| <i>Stenotrophomonas Maltophilia</i> | 2                                                           |
| <i>Escherichia Coli</i>             | 1                                                           |
| <i>Candida spp</i>                  | 6                                                           |
| <i>Aspergillus Fumigatus</i>        | 3                                                           |
| <i>Citomegalovirus</i>              | 3                                                           |
| <i>Herpes Simplex Virus</i>         | 3                                                           |
| <i>Epstein-Barr Virus</i>           | 2                                                           |
| <i>H1N1 Virus</i>                   | 1                                                           |

\* MRSA: Methicillin-resistant *Staphylococcus aureus*.

† Sum exceeds the number of positive BAL cases reported in the text because 10 samples presented growth of multiple non-contaminant microbes.

**FIGURES**

**Figure E1. PTX3 as a marker of confirmed bacterial pneumonia.** When we compared only the fifty-eight negative cases vs. the twelve patients with proven bacterial pneumonia (total n=70), PTX3 diagnostic accuracy was confirmed by ROC curve analysis ( $AUC^{ROC}$  0.827, IC95% 0.668-0.987,  $p < 0.0001$ ) while BAL sTREM-1, plasma PTX3, sTREM-1, CRP and PCT couldn't predict bacterial pneumonia.

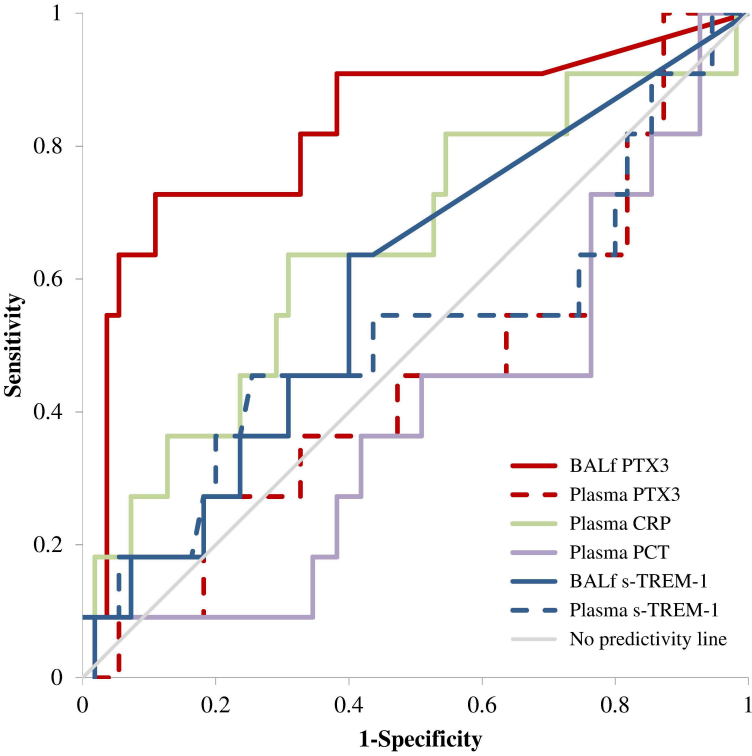

Supplement: 13054_2014_562_MOESM1_ESM.pdf [file 13054_2014_562_MOESM1_ESM.pdf]
